# Supplementary material for: A single-crystal imprints macroscopic orientation on xenon atoms
Source: Royal Society of Chemistry journal article supplement (doi:10.1039/b612002d), 2006-11-23
Supplement: b612002d.pdf [file b612002d.pdf]

## Supplementary Information

### A single-crystal imprints macroscopic orientation to xenon atoms

Angiolina Comotti, Silvia Bracco, Lisa Ferretti, Michele Mauri, Roberto Simonutti, Piero Sozzani,\*

Department of Materials Science, University of Milano Bicocca, via R. Cozzi 53, 20125 Milano, Italy.

#### Experimental part

**Synthesis.** Porous single-crystals of tris-*o*-phenylenedioxy-cyclotriphosphazene were crystallized from a supersaturated benzene solution at 80°C over 48 hours. The benzene removal was performed by heating the single crystals from 25 to 80°C at a rate of 5°C/h and at a pressure of 10<sup>-1</sup>-10<sup>-2</sup> torr.

**X-ray diffraction analysis.** The X-ray data collection of the nanoporous single-crystals were performed on an Oxford Xcalibur automated 4-circle diffractometer with  $\theta$  geometry equipped with a CCD detector and a Mo-target X-ray tube operating with a radiation wavelength  $\lambda$  of 0.71073 Å.

**Hyperpolarized Xe NMR.** Hyperpolarization <sup>129</sup>Xe NMR experiments were performed by a home-built apparatus with a continuous flow set-up with a Bruker Avance 300 spectrometer operating at a Larmor Frequency of 83.02 MHz for <sup>129</sup>Xe. A diode array laser delivering 16 W at 795 nm was applied. A stream of gas mixture containing 2% xenon, 2% nitrogen and 96% helium was used in most of the experiments and gas flow rates were optimized in between 200-300 cm<sup>3</sup>/min. The polarization was about 5%. An home-made Teflon support endowed with a goniometer was inserted in a horizontal coil and rotated at chosen angles with respect to the magnetic field. The samples were equilibrated in the gas stream for at least 20 minutes before collecting the NMR spectra. The remarkable sensitivity of the hyperpolarized technique allowed the detection of xenon resonances in a single-crystal under ambient conditions and in natural isotope abundance.

**Adsorption isotherm.** Xenon adsorption isotherms were determined by volumetric measurements equipped with precision manometers ( $\pm 0.5$  torr). Absorption equilibrium was reached within 30÷90 min.

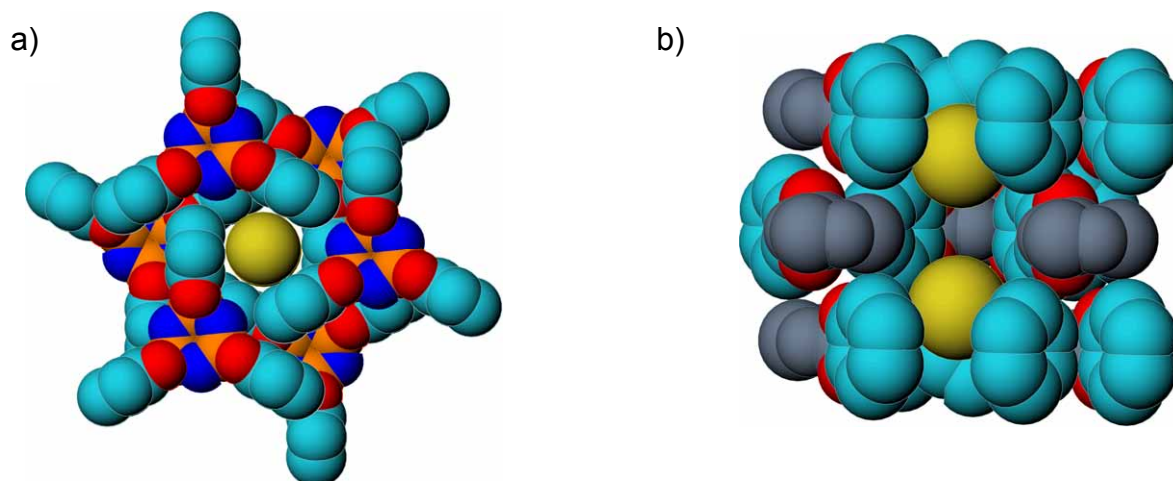

**Figure 1.** Crystal structure of the nanoporous crystals showing xenon diffusing in a single nanochannel view a) along the *c* axis and b) perpendicular to the *c* axis. The channel cross section is about 4.6 Å. The following van der Waals radii have been adopted: 1.7 Å for C (light blue), 1.5 Å for O (red), 1.5 Å for N (blue), 1.8 Å for P (orange) and 2.2 Å for Xe (yellow). A tight fitting can be observed between the xenon atom and the surrounding structure. The nanochannel is fully lined with phenylenedioxy moieties facing the channel axis. The nanochannels run parallel to the *c* axis of the crystal.

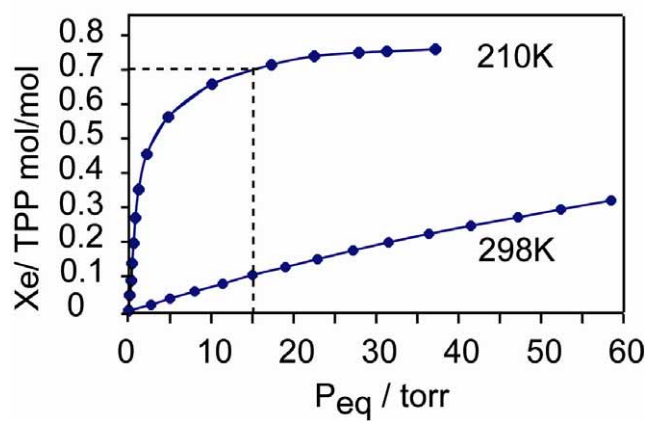

**Figure 2.** Xenon absorption isotherms at 210 K and at room temperature. At low temperature and at 15.2 torr partial pressure (2% Xe concentration), 0.7 xenon moles per mole of **1** are absorbed.
